# Supplementary material for: Clinical course and outcome in patients with severe dysphagia after lateral medullary syndrome
Source: PubMed Central journal article supplement — Ther Adv Neurol Disord. 2018 Feb 28;11:1756286418759864. doi: 10.1177/1756286418759864 (PMC5833167; doi:10.1177/1756286418759864), 2018-02-28

Esophageal passage seen with RT head rotation

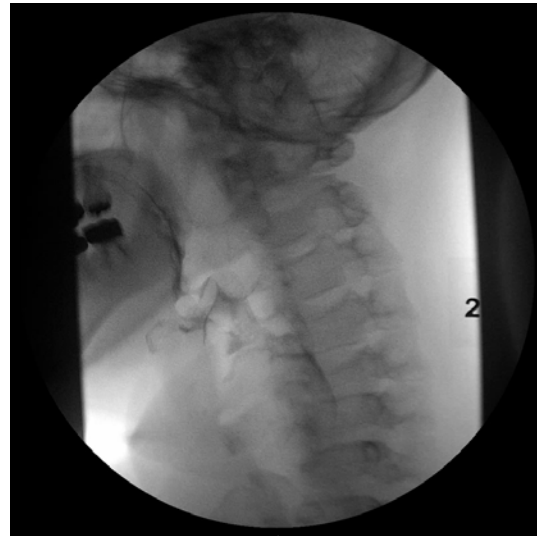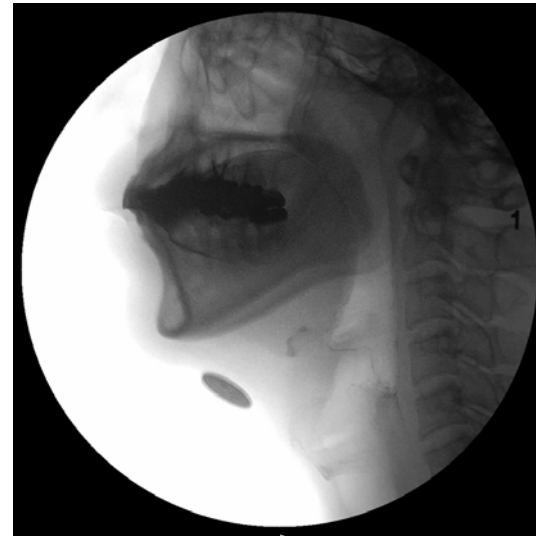

Recovery of normal swallowing function

No esophageal passage

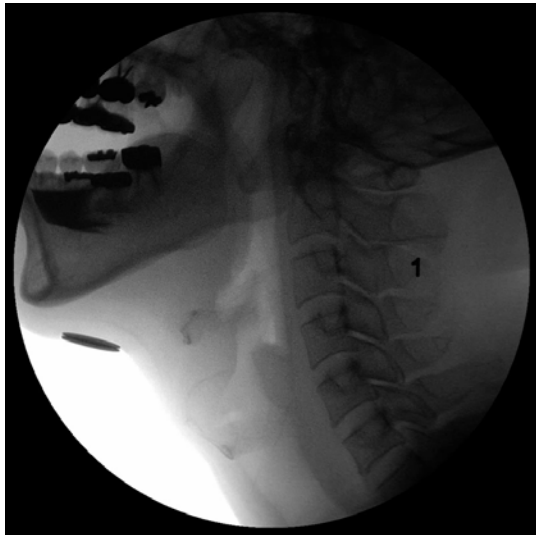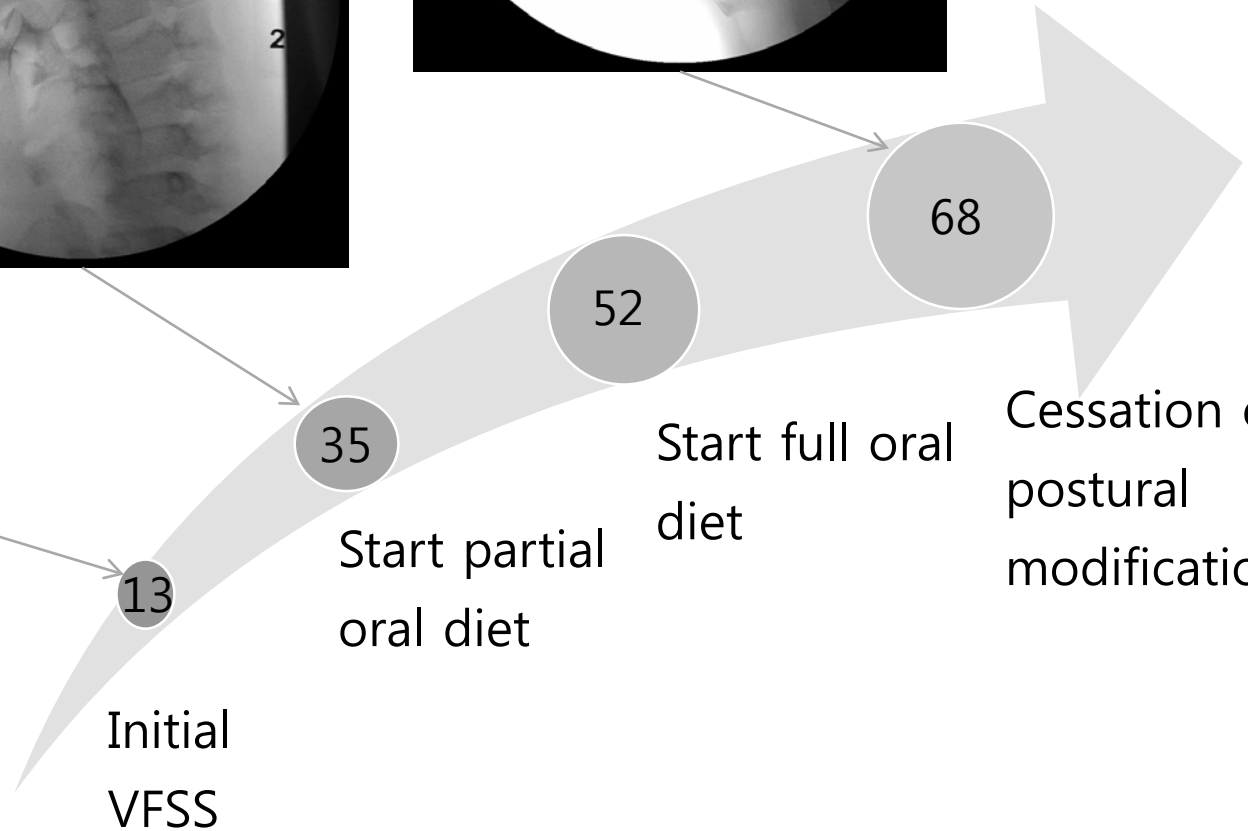

Supplement: Supplementray_materials.pdf [file Supplementray_materials.pdf]
